# Supplementary material for: Does Shiftwork Impact Cognitive Performance? Findings from the Canadian Longitudinal Study on Aging (CLSA)
Source: MDPI journal article supplement (doi:10.3390/ijerph191610124), 2022-08-16
Supplement: s1 [file s1]

**Supplementary Table S1.** Weighted sample characteristics, stratified by retirement status and sex (N=22,485)

| Characteristic           | Males       |            |            | Females    |            |
|--------------------------|-------------|------------|------------|------------|------------|
|                          | All         | Completely | Not/Partly | Completely | Not/Partly |
|                          | (N= 22,485) | Retired    | Retired    | Retired    | Retired    |
|                          |             | (n=5,484)  | (n=6,886)  | (n=5,149)  | (n=4,966)  |
|                          | %           | %          | %          | %          | %          |
| <b>Shift Work Status</b> |             |            |            |            |            |
| No shift work            | 82.8        | 79.9       | 82.2       | 85.1       | 83.8       |
| Shift work               | 17.2        | 20.1       | 17.8       | 14.5       | 16.2       |
| Missing                  | 0.0         | 0.0        | 0.0        | 0.4        | -          |
| <b>Age (years)</b>       |             |            |            |            |            |
| Mean (SD)                | 60.0 (10.2) | 69.0 (8.2) | 54.5 (7.2) | 68.4 (8.3) | 54.0 (6.6) |
| 45 -54 years             | 37.6        | 2.8        | 59.5       | 4.9        | 60.1       |
| 55 -64 years             | 31.4        | 30.1       | 31.3       | 30.6       | 33.3       |
| 65 - 74 years            | 19.2        | 38.5       | 7.5        | 38.0       | 5.5        |
| 75 – 85 years            | 11.8        | 28.5       | 1.7        | 26.5       | 1.1        |
| <b>Education</b>         |             |            |            |            |            |
| Less than secondary      | 17.3        | 27.7       | 11.4       | 28.1       | 8.8        |
| Secondary                | 11.5        | 11.7       | 10.1       | 14.3       | 11.0       |
| Some post-secondary      | 8.9         | 9.2        | 8.7        | 9.8        | 8.3        |
| Post-secondary           | 62.2        | 51.1       | 69.8       | 47.8       | 71.8       |
| Missing                  | 0.0         | 0.3        | 0.0        | 0.0        | 0.0        |

Acronyms: SD: Standard deviation.

Note: Multimorbidity is defined as  $\geq 2$  of the following conditions: anxiety or depression, cancer, cardiovascular disease, asthma, COPD, diabetes, arthritis, stroke.

**Supplementary Table S1 (continued)**

| Characteristic                                          | All<br>(N= 22,485) | Males      |            | Females    |            |
|---------------------------------------------------------|--------------------|------------|------------|------------|------------|
|                                                         |                    | Completely | Not/Partly | Completely | Not/Partly |
|                                                         |                    | Retired    | Retired    | Retired    | Retired    |
|                                                         |                    | (n=5,484)  | (n=6,886)  | (n=5,149)  | (n=4,966)  |
|                                                         | %                  | %          | %          | %          | %          |
| <b>Household Income</b>                                 |                    |            |            |            |            |
| Less than \$20,000                                      | 4.3                | 6.8        | 1.8        | 9.1        | 1.9        |
| \$20,000 - \$49,999                                     | 20.4               | 30.2       | 10.5       | 36.1       | 14.1       |
| \$50,000 - \$99,999                                     | 32.3               | 38.5       | 29.6       | 30.3       | 32.9       |
| \$100,000 - \$149,999                                   | 20.2               | 12.3       | 27.6       | 9.1        | 25.2       |
| Greater than \$150,000                                  | 17.1               | 6.3        | 27.2       | 4.8        | 21.3       |
| Missing                                                 | 5.6                | 5.9        | 3.4        | 10.6       | 4.6        |
| <b>Marital Status</b>                                   |                    |            |            |            |            |
| Single, never married, or never lived<br>with a partner | 7.8                | 6.4        | 7.7        | 7.3        | 9.4        |
| Married or common law                                   | 75.2               | 78.5       | 84.7       | 60.5       | 71.3       |
| Widowed, divorced or separated                          | 17.0               | 15.1       | 7.6        | 32.2       | 19.1       |
| Missing                                                 | 0.0                | -          | 0.0        | 0.0        | 0.2        |
| <b>Migrant Status</b>                                   |                    |            |            |            |            |
| Non-Immigrant                                           | 81.3               | 80.3       | 80.8       | 81.9       | 82.3       |
| Immigrant                                               | 11.9               | 14.4       | 11.2       | 12.3       | 10.5       |
| Missing                                                 | 6.8                | 5.3        | 8.0        | 5.8        | 7.2        |

Acronyms: SD: Standard deviation.

Note: Multimorbidity is defined as  $\geq 2$  of the following conditions: anxiety or depression, cancer, cardiovascular disease, asthma, COPD, diabetes, arthritis, stroke.

Supplementary Table S1 (continued)

| Characteristic                                               | All<br>(N= 22,485) | Males        |              | Females      |              |
|--------------------------------------------------------------|--------------------|--------------|--------------|--------------|--------------|
|                                                              |                    | Completely   | Not/Partly   | Completely   | Not/Partly   |
|                                                              |                    | Retired      | Retired      | Retired      | Retired      |
|                                                              |                    | (n=5,484)    | (n=6,886)    | (n=5,149)    | (n=4,966)    |
|                                                              | %                  | %            | %            | %            | %            |
| <b>Place of Residence</b>                                    |                    |              |              |              |              |
| Rural                                                        | 5.1                | 4.8          | 4.7          | 4.7          | 6.2          |
| Urban                                                        | 90.4               | 90.6         | 90.5         | 90.9         | 89.9         |
| Suburban                                                     | 4.5                | 4.6          | 4.8          | 4.4          | 3.9          |
| <b>Socially Isolated</b>                                     |                    |              |              |              |              |
| No                                                           | 79.2               | 56.9         | 91.0         | 60.9         | 94.6         |
| Yes                                                          | 20.7               | 42.8         | 9.0          | 38.8         | 5.4          |
| Missing                                                      | 0.1                | 0.3          | 0.0          | 0.3          | 0.0          |
| <b>Smoking Status</b>                                        |                    |              |              |              |              |
| Never smoker                                                 | 30.0               | 21.6         | 30.7         | 32.1         | 33.6         |
| Former smoker                                                | 58.9               | 68.5         | 58.7         | 57.3         | 53.1         |
| Occasional or daily smoker                                   | 10.7               | 9.3          | 10.4         | 9.6          | 12.9         |
| Missing                                                      | 0.5                | 0.6          | 0.3          | 1.0          | 0.4          |
| <b>Past Week Physical Activity<br/>(PASE scale: 0 - 693)</b> |                    |              |              |              |              |
| Mean (Standard Deviation)                                    | 152.0 (78.7)       | 125.2 (59.3) | 182.5 (83.3) | 110.1 (54.2) | 163.1 (80.1) |
| Missing (n)                                                  | 1,138              | 314          | 303          | 281          | 240          |

Acronyms: SD: Standard deviation.

Note: Multimorbidity is defined as  $\geq 2$  of the following conditions: anxiety or depression, cancer, cardiovascular disease, asthma, COPD, diabetes, arthritis, stroke.

**Supplementary Table S1 (continued)**

| Characteristic                    | Males       |            |            | Females    |            |
|-----------------------------------|-------------|------------|------------|------------|------------|
|                                   | All         | Completely | Not/Partly | Completely | Not/Partly |
|                                   | (N= 22,485) | Retired    | Retired    | Retired    | Retired    |
|                                   |             | (n=5,484)  | (n=6,886)  | (n=5,149)  | (n=4,966)  |
|                                   | %           | %          | %          | %          | %          |
| <b>Alcohol Consumption</b>        |             |            |            |            |            |
| Never drinker                     | 2.6         | 2.1        | 1.6        | 4.6        | 2.6        |
| Former drinker                    | 13.1        | 14.0       | 10.6       | 18.2       | 11.9       |
| Infrequent drinker                | 11.8        | 9.3        | 8.7        | 17.0       | 14.0       |
| Occasional drinker                | 25.7        | 22.4       | 26.3       | 23.9       | 28.8       |
| Regular drinker                   | 43.5        | 48.9       | 48.3       | 34.7       | 39.8       |
| Binge drinker                     | 3.3         | 3.3        | 4.5        | 1.6        | 2.8        |
| Missing                           | 0.0         | 0.0        | 0.0        | 0.0        | 0.1        |
| <b>Fruit and Vegetable Intake</b> |             |            |            |            |            |
| <b>(Servings/ day)</b>            |             |            |            |            |            |
| Seven or more                     | 10.2        | 7.5        | 7.6        | 12.1       | 14.4       |
| Six                               | 9.5         | 6.6        | 7.3        | 12.5       | 12.1       |
| Five                              | 16.1        | 11.9       | 13.7       | 18.2       | 20.8       |
| Four                              | 16.2        | 13.6       | 14.9       | 18.4       | 18.4       |
| Three                             | 16.5        | 18.2       | 18.6       | 14.1       | 14.2       |
| Two                               | 14.8        | 18.5       | 18.4       | 11.2       | 10.1       |
| Less than two                     | 10.3        | 16.3       | 13.8       | 6.3        | 4.2        |
| Missing                           | 6.3         | 7.4        | 5.6        | 7.2        | 5.8        |

Acronyms: SD: Standard deviation.

Note: Multimorbidity is defined as  $\geq 2$  of the following conditions: anxiety or depression, cancer, cardiovascular disease, asthma, COPD, diabetes, arthritis, stroke.

**Supplementary Table S1 (continued)**

| Characteristic                      | All<br>(N= 22,485) | Males      |            | Females    |            |
|-------------------------------------|--------------------|------------|------------|------------|------------|
|                                     |                    | Completely | Not/Partly | Completely | Not/Partly |
|                                     |                    | Retired    | Retired    | Retired    | Retired    |
|                                     |                    | (n=5,484)  | (n=6,886)  | (n=5,149)  | (n=4,966)  |
|                                     | %                  | %          | %          | %          | %          |
| <b>BMI (kg/m<sup>2</sup>)</b>       |                    |            |            |            |            |
| Underweight or normal weight        | 28.0               | 22.4       | 22.4       | 30.8       | 37.6       |
| Overweight                          | 39.6               | 43.4       | 45.4       | 36.8       | 30.8       |
| Obese                               | 31.1               | 32.4       | 30.9       | 31.4       | 30.3       |
| Missing                             | 1.3                | 1.8        | 1.3        | 1.0        | 1.3        |
| <b>Self-rated Health</b>            |                    |            |            |            |            |
| Excellent or Good Self-Rated Health | 91.1               | 86.7       | 92.2       | 89.6       | 94.1       |
| Fair or Poor Self-Rated Health      | 8.9                | 13.3       | 7.7        | 10.4       | 5.9        |
| Missing                             | 0.0                | 0.0        | 0.1        | 0.0        | 0.0        |
| <b>Multimorbidity</b>               |                    |            |            |            |            |
| 0 -1 Chronic Disease                | 72.1               | 63.5       | 83.3       | 57.8       | 74.6       |
| ≥ 2 Chronic Diseases                | 27.9               | 36.5       | 16.7       | 42.2       | 25.4       |
| <b>Psychological Distress</b>       |                    |            |            |            |            |
| Low Distress                        | 81.9               | 82.8       | 85.0       | 77.6       | 80.4       |
| High Distress                       | 12.1               | 10.0       | 10.3       | 15.2       | 13.7       |
| Missing                             | 6.0                | 7.2        | 4.7        | 7.2        | 5.9        |
| <b>Sleep Quality</b>                |                    |            |            |            |            |
| Good Sleep Quality                  | 74.1               | 79.1       | 75.4       | 72.7       | 69.6       |
| Poor Sleep Quality                  | 25.8               | 20.8       | 24.5       | 27.2       | 30.4       |
| Missing                             | 0.0                | 0.2        | 0.0        | 0.1        | 0.0        |

Acronyms: SD: Standard deviation.

Note: Multimorbidity is defined as ≥ 2 of the following conditions: anxiety or depression, cancer, cardiovascular disease, asthma, COPD, diabetes, arthritis, stroke.

**Supplementary Table S2.** Weighted sample characteristics of shiftworkers by sex (N=3,632)

|                         | All         | Males       | Females     |
|-------------------------|-------------|-------------|-------------|
| Characteristic          | (N= 3,632)  | (n=2,131)   | (n=1,501)   |
|                         | %           | %           | %           |
| <b>Age (years)</b>      |             |             |             |
| Mean (SD)               | 60.1 (10.0) | 60.4 (10.0) | 59.7 (10,2) |
| 45 -54 years            | 35.2        | 34.8        | 35.8        |
| 55 -64 years            | 34.2        | 33.3        | 35.6        |
| 65 - 74 years           | 19.8        | 20.7        | 18.4        |
| 75 – 85 years           | 10.8        | 11.2        | 10.2        |
| <b>Education</b>        |             |             |             |
| Less than secondary     | 24.0        | 24.7        | 23.2        |
| Secondary               | 11.1        | 13.0        | 8.5         |
| Some post-secondary     | 9.7         | 11.5        | 7.1         |
| Post-secondary          | 55.1        | 50.9        | 61.1        |
| Missing                 | 0.0         | 0.0         | 0.0         |
| <b>Household Income</b> |             |             |             |
| Less than \$20,000      | 6.8         | 4.7         | 9.9         |
| \$20,000 - \$49,999     | 24.1        | 20.6        | 29.1        |
| \$50,000 - \$99,999     | 32.4        | 33.9        | 30.3        |
| \$100,000 - \$149,999   | 17.6        | 19.5        | 14.9        |
| Greater than \$150,000  | 14.2        | 17.0        | 10.2        |
| Missing                 | 4.8         | 4.3         | 5.5         |

Acronyms: SD: Standard deviation.

Note: Multimorbidity is defined as  $\geq 2$  of the following conditions: anxiety or depression, cancer, cardiovascular disease, asthma, COPD, diabetes, arthritis, stroke.

**Supplementary Table S2 (continued)**

|                                                         | <b>All</b>        | <b>Males</b>     | <b>Females</b>   |
|---------------------------------------------------------|-------------------|------------------|------------------|
| <b>Characteristic</b>                                   | <b>(N= 3,632)</b> | <b>(n=2,131)</b> | <b>(n=1,501)</b> |
|                                                         | <b>%</b>          | <b>%</b>         | <b>%</b>         |
| <b>Marital Status</b>                                   |                   |                  |                  |
| Single, never married, or<br>never lived with a partner | 9.1               | 7.8              | 11.0             |
| Married or common law                                   | 73.9              | 81.3             | 63.4             |
| Widowed, divorced or<br>separated                       | 16.8              | 10.9             | 25.3             |
| Missing                                                 | 0.0               | -                | 0.2              |
| <b>Migrant Status</b>                                   |                   |                  |                  |
| Non-Immigrant                                           | 79.2              | 79.9             | 78.2             |
| Immigrant                                               | 11.9              | 12.0             | 11.8             |
| Missing                                                 | 8.9               | 8.1              | 10.0             |
| <b>Place of Residence</b>                               |                   |                  |                  |
| Rural                                                   | 6.6               | 7.0              | 6.0              |
| Urban                                                   | 88.9              | 87.9             | 90.3             |
| Suburban                                                | 4.4               | 5.0              | 3.6              |
| <b>Socially Isolated</b>                                |                   |                  |                  |
| No                                                      | 79.4              | 78.6             | 80.5             |
| Yes                                                     | 20.3              | 21.0             | 19.3             |
| Missing                                                 | 0.3               | 0.4              | 0.2              |

Acronyms: SD: Standard deviation.

Note: Multimorbidity is defined as  $\geq 2$  of the following conditions: anxiety or depression, cancer, cardiovascular disease, asthma, COPD, diabetes, arthritis, stroke.

**Supplementary Table S2 (continued)**

|                                                          | All          | Males        | Females      |
|----------------------------------------------------------|--------------|--------------|--------------|
| Characteristic                                           | (N= 3,632)   | (n=2,131)    | (n=1,501)    |
|                                                          | %            | %            | %            |
| <b>Smoking Status</b>                                    |              |              |              |
| Never smoker                                             | 31.3         | 27.5         | 36.8         |
| Former smoker                                            | 56.8         | 60.9         | 50.8         |
| Occasional or daily smoker                               | 11.4         | 11.3         | 11.7         |
| Missing                                                  | 0.4          | 0.3          | 0.7          |
| <b>Past Week Physical Activity (PASE scale: 0 - 693)</b> |              |              |              |
| Mean (Standard Deviation)                                | 163.6 (85.6) | 168.4 (85.9) | 156.5 (84.7) |
| Missing (n)                                              | 218          | 121          | 97           |
| <b>Alcohol Consumption</b>                               |              |              |              |
| Never drinker                                            | 2.8          | 2.4          | 3.4          |
| Former drinker                                           | 17.2         | 15.7         | 19.2         |
| Infrequent drinker                                       | 12.7         | 9.8          | 16.7         |
| Occasional drinker                                       | 25.8         | 25.4         | 26.3         |
| Regular drinker                                          | 37.9         | 41.8         | 32.4         |
| Binge drinker                                            | 3.6          | 4.7          | 1.9          |
| Missing                                                  | 0.0          | 0.0          | 0.1          |

Acronyms: SD: Standard deviation.

Note: Multimorbidity is defined as  $\geq 2$  of the following conditions: anxiety or depression, cancer, cardiovascular disease, asthma, COPD, diabetes, arthritis, stroke.



**Supplementary Table S2 (continued)**

|                               | <b>All</b>        | <b>Males</b>     | <b>Females</b>   |
|-------------------------------|-------------------|------------------|------------------|
| <b>Characteristic</b>         | <b>(N= 3,632)</b> | <b>(n=2,131)</b> | <b>(n=1,501)</b> |
|                               | <b>%</b>          | <b>%</b>         | <b>%</b>         |
| <b>Fruit and Vegetable</b>    |                   |                  |                  |
| <b>Intake (Servings/ day)</b> |                   |                  |                  |
| Seven or more                 | 10.1              | 8.0              | 13.2             |
| Six                           | 9.1               | 9.2              | 9.1              |
| Five                          | 14.9              | 11.0             | 20.6             |
| Four                          | 15.8              | 13.4             | 19.1             |
| Three                         | 14.0              | 15.6             | 11.8             |
| Two                           | 16.9              | 20.9             | 11.3             |
| Less than two                 | 11.6              | 14.9             | 6.7              |
| Missing                       | 7.5               | 7.1              | 8.2              |
| <b>BMI (kg/m<sup>2</sup>)</b> |                   |                  |                  |
| Underweight or normal         |                   |                  |                  |
| weight                        | 24.3              | 18.4             | 32.7             |
| Overweight                    | 39.7              | 44.9             | 32.2             |
| Obese                         | 34.6              | 34.9             | 34.2             |
| Missing                       | 1.4               | 1.8              | 0.8              |
| <b>Self-rated Health</b>      |                   |                  |                  |
| Excellent or Good Self-       |                   |                  |                  |
| Rated Health                  | 88.8              | 87.3             | 91.0             |
| Fair or Poor Self-Rated       |                   |                  |                  |
| Health                        | 11.1              | 12.6             | 9.0              |
| Missing                       | 0.0               | 0.0              | 0.0              |

Acronyms: SD: Standard deviation.

Note: Multimorbidity is defined as  $\geq 2$  of the following conditions: anxiety or depression, cancer, cardiovascular disease, asthma, COPD, diabetes, arthritis, stroke.

**Supplementary Table S2 (continued)**

|                               | All        | Males     | Females   |
|-------------------------------|------------|-----------|-----------|
| Characteristic                | (N= 3,632) | (n=2,131) | (n=1,501) |
|                               | %          | %         | %         |
| <b>Multimorbidity</b>         |            |           |           |
| 0 -1 Chronic Disease          | 69.6       | 73.0      | 64.6      |
| ≥ 2 Chronic Diseases          | 30.4       | 27.0      | 35.4      |
| <b>Psychological Distress</b> |            |           |           |
| Low Distress                  | 81.4       | 82.9      | 79.1      |
| High Distress                 | 11.9       | 10.6      | 13.9      |
| Missing                       | 6.7        | 6.5       | 7.0       |
| <b>Sleep Quality</b>          |            |           |           |
| Good Sleep Quality            | 73.0       | 74.3      | 71.1      |
| Poor Sleep Quality            | 27.0       | 25.6      | 28.9      |
| Missing                       | 0.0        | 0.0       | 0.0       |

Acronyms: SD: Standard deviation.

Note: Multimorbidity is defined as  $\geq 2$  of the following conditions: anxiety or depression, cancer, cardiovascular disease, asthma, COPD, diabetes, arthritis, stroke.

**Supplementary Table S3.** Weighted descriptive analysis of cognition scores among shiftworkers by sex (N=3,312).

|                                               | All        | Males      | Females    |
|-----------------------------------------------|------------|------------|------------|
| Cognition scores                              | (N= 3,312) | (n=1,932)  | (n=1,380)  |
|                                               | n          | n          | n          |
| <b>Immediate Recall (0 – 14 points)</b>       |            |            |            |
| Mean (SD)                                     | 5.6 (1.8)  | 5.3 (1.71) | 6.1 (1.9)  |
| <b>Delayed Recall (0 – 14 points)</b>         |            |            |            |
| Mean (SD)                                     | 3.9 (2.0)  | 3.5 (1.9)  | 4.4 (2.1)  |
| <b>MAT Score (0 – 51 points)</b>              |            |            |            |
| Mean (SD)                                     | 25.7 (9.0) | 26.4 (9.0) | 24.7 (8.9) |
| <b>Interference Condition (1-132 seconds)</b> |            |            |            |
| Mean (SD)                                     | 16.7 (5.0) | 16.8 (4.9) | 16.5 (5.0) |

Acronyms: SD: Standard deviation.

**Supplementary Table S4.** Interaction effect between psychological distress and shift work

|                               | <b>B</b> | <b>95% CI</b> |
|-------------------------------|----------|---------------|
| <b>Immediate Recall Trial</b> |          |               |
| Shift Work x High Distress    | 0.22     | -0.05, 0.48   |
| <b>Delayed Recall Trial</b>   |          |               |
| Shift Work x High Distress    | 0.09     | -0.19, 0.37   |
| <b>MAT</b>                    |          |               |
| Shift Work x High Distress    | -0.36    | -1.57, 0.85   |
| <b>Interference Condition</b> |          |               |
| Shift Work x High Distress    | 0.60     | -0.08, 1.28   |

Abbreviations: CI: confidence interval;  
Significant results are bolded.
